# Supplementary material for: The Clinical and Genetic Spectrum of 82 Patients With RAG Deficiency Including a c.256_257delAA Founder Variant in Slavic Countries
Source: Front Immunol. 2020 Jun 10;11:900. doi: 10.3389/fimmu.2020.00900 (PMC7325958; doi:10.3389/fimmu.2020.00900)
Supplement: Supplementary file 1 [file Table_1.xlsx]

## Sheet: RAG1
		Supplementary Table E1.Immunologic and genetic characteristics of RAG1 Slavic cohort.
		№.	Country	Patient №_gender	Allele 1			Allele 2			Average RAG activity	Immunologic phenotype	Clinical phenotype	T cells (cells/µL)	B cells (cells/µL)	Age of onset	Age of diagnosis	Current age	Consanguinity	Refer-ence
					c.DNA	protein	RAG activity	c.DNA	protein	RAG activity
						Omenn syndrome
		1	Poland	1_f	c.256_257del	K86Vfs*33	2.7 ± 0.3	c.256_257del	K86Vfs*33	2.7 ± 0.3	2.7 ± 0.3	T+B-NK+	OS	2210 (67.9%)	68 (2.1%)	2 w	8 m	Died	no	[13]
		2	Poland	2a_m	c.256_257del	K86Vfs*33	2.7 ± 0.3	c.256_257del	K86Vfs*33	2.7 ± 0.3	2.7 ± 0.3	T+B-NK+	OS	9000 (90%)	4 (1%)	1 m	1 m	Alive after HSCT, 13 y.o	yes	[10]
		3	Poland	2b_m	c.256_257del	K86Vfs*33	2.7 ± 0.3	c.256_257del	K86Vfs*33	2.7 ± 0.3	2.7 ± 0.3	T+B-NK+	OS	1190 (70%)	78 (2%)	1 d	1 m	Died after HSCT	yes	[10]
		4	Lithuania (Polish origin)	3_m	c.256_257del	K86Vfs*33	2.7 ± 0.3	c.256_257del	K86Vfs*33	2.7 ± 0.3	2.7 ± 0.3	T+B-NK+	OS	6672 (92%)	51 (0.7%)	1 m	2 m	Alive after HSCT, 1.6 y.o.	no
		5	Russia	4_f	c.256_257del	K86Vfs*33	2.7 ± 0.3	с.424C>T	R142X	9.0 ± 4.0	5.8 ± 2.1	T+B-NK+	OS	2200	0	1 w	4 m	Died	no
		6	Poland	5_f	c.256_257del	K86Vfs*33	2.7 ± 0.3	c.1186C>T	R396C	0.6 ± 0.1	1.6 ± 0.2	T+B-NK+	OS	4057 (89%)	4 (0%)	1 d	2 m	Died	no
		7	Russia	6_m	c.256_257del	K86Vfs*33	2.7 ± 0.3	c.1331C>T	A444V	1.4 ± 0.2	3.4 ± 0.2	T+B-NK+	OS	499 (25.9%)	0 (0%)	3 w	4 m	Alive after HSCT, 3 y.o.	no
		8	Russia	7a_f	c.256_257del	K86Vfs*33	2.7 ± 0.3	c.1677G>C	R559S	1.0 ± 0.4	1.8 ± 0.3	T+B-NK+	OS	4560	0	2 w	3 m	Alive after HSCT, 12 y.o.	no
		9	Russia	7b_f	c.256_257del	K86Vfs*33	2.7 ± 0.3	c.1677G>C	R559S	1.0 ± 0.4	1.8 ± 0.3	T+B-NK+	OS	1210	0	2 w	3 m	Died	no
		10	Russia	7c_m	c.256_257del	K86Vfs*33	2.7 ± 0.3	c.1677G>C	R559S	1.0 ± 0.4	1.8 ± 0.3	T+B-NK+	OS	4330 (79%)	10 (0.2%)	1 m	2 m	Died	no	[9,13]
		11	Serbia	8a_m	c.256_257del	K86Vfs*33	2.7 ± 0.3	c.1870C>T	R624C	0.1 ± 0.1	1.4 ± 0.2	T+B-NK+	OS	**	**	1 m	4 m	Died	no	[19]
		12	Serbia	8b_m	c.256_257del	K86Vfs*33	2.7 ± 0.3	c.1870C>T	R624C	0.1 ± 0.1	1.4 ± 0.2	T+B-NK+	OS	**	**	1 d	1 d	Alive after HSCT, 7 y.o.	no	[19]
		13	Czech Rep	9_f	c.256_257del	K86Vfs*33	2.7 ± 0.3	c.1908_1926dup	V643Qfs*9	0.0 ± 0.0	1.3 ± 0.2	T+B-NK+	OS	1094 (32%)	20 (0.6%)	3 m	6 m	Died, 8 m.	no
		14	Slovenia	10_m	c.256_257del	K86Vfs*33	2.7 ± 0.3	c.2125G>A	G709S	0.6 ± 0.1	1.8 ± 0.2	T+B-NK+	OS	4054 (77%)	8 (0.1%)	3 w	5 m	Alive after HSCT, 4 y.o.	no
		15	Russia	11b_f	c.256_257del	K86Vfs*33	2.7 ± 0.3	c.2164G>A	E722K	0.0 ± 0.2	1.3 ± 0.2	T+B-NK+	OS	1560 (21%)	2 (0.1%)	1 d	2 w	Alive after HSCT, 7 y.o.	no	[9]
		16	Czech Rep	12_f	c.256_257del	K86Vfs*33	2.7 ± 0.3	c.2210G>A	R737H	0.2 ± 0.0	1.4 ± 0.1	T+B-NK+	OS	53238 (93.4%)	11 (0.002%)	4 w	5 w	Alive after HSCT, 9 y.o.	no	[13]
		17	Montenegr	13_f	c.256_257del	K86Vfs*33	2.7 ± 0.3	c.2164G>A	E722K	0.0 ± 0.2	1.3 ± 0.2	T+B-NK+	OS	**	**	1 m	6 m	Died	no	[19]
		18	Croatia	14_m	c.256_257del	K86Vfs*33	2.7 ± 0.3	c.2487_2488delinsTT	R829_K830delinsS*	0.0 ± 0.0	1.3 ± 0.2	T+B-NK+	OS	6292	90	6 w	2 m	Alive after HSCT, 8 y.o.	no
		19	Slovenia	15_m	c.256_257del	K86Vfs*33	2.7 ± 0.3	c.2706dupT	K903*	0.0 ± 0.0	1.3 ± 0.2	T+B-NK+	OS	4843 (76%)	127 (2%)	7 w	9 w	Died	no
		20	Poland	16_f	c.256_257del	K86Vfs*33	2.7 ± 0.3	c.2867T>C	I956T	3.5 ± 0.2	3.1 ± 0.2	T+B-NK+	OS	1575 (59%)	27 (1%)	1 m	1 m	Alive after HSCT, 4 y.o.	no	[11]
		21	Russia	17a_f	c.256_257del	K86Vfs*33	2.7 ± 0.3	c.2934del	N978Kfs*13	0.0 ± 0.0	1.3 ± 0.2	T+B-NK+	OS	3400	0	1 w	1 m	Died	no
		22	Russia	17b_f	c.256_257del	K86Vfs*33	2.7 ± 0.3	c.2934del	N978Kfs*13	0.0 ± 0.0	1.3 ± 0.2	T+B-NK+	OS	1120	0	20 d	3 m	Died	no
		23	Russia	18_m	c.424C>T	R142*	9.0 ± 4.0	c.1464C>G	Y488*	0.0 ± 0.0	4.5 ± 2.0	T+B-NK+	OS	500 (9%)	12 (0.6%)	1.5 m	3.5 m	Died after HSCT, 4 m.	no
		24	Czech Rep	19_m	c.983G>A	C328Y	16.0 ± 2.9	c.1186C>T	R396С	0.6 ± 0.1	8.3 ± 1.5	T+B-NK+	OS	4640 (63%)	30 (0.4%)	1 d	3 d	Alive after HSCT, 2 y.o.	no
		25	Russia	20_f	c.1228C>T	R410W	0.0 ± 0.0	c.1677G>C	R559S	1.0 ± 0.4	0.5 ± 0.2	T+B-NK+	OS	500 (7.9%)	0 (0.2%)	1 m	5 m	Died	no
		26	Poland	21b_f	c.983G>A	C328Y	16.0 ± 2.9	c.2771ins~10 k	c.2771ins~10 kb	0.0 ± 0.0	8.3 ± 1.5	T+B-NK+	OS	1118 (46%)	9 (0.4%)	1 m	5 m	Alive after HSCT, 14 y.o.	no
		27	Ukraine	22_f	c.1331C>T	A444V	1.4 ± 0.2	c.1871G>A	R624H	0.0 ± 0.4	0.7 ± 0.3	T+B-NK+	OS	16933 (89.3%)	5 (0%)	1 d	1 m	Died	no	[9]
		28	Slovakia	23_m	c.1682G>A	R561H	2.0 ± 0.6	c.2345T>A	V782D	0.0 ± 0.0	1.0 ± 0.3	T+B-NK+	OS	1480 (21.2%)	50 (0.7%)	3 w	5 w	Alive after HSCT, 3 y.o.	no
		29	Russia	24_m	c.1681C>T	R561C	3.2 ± 0.5	c.2930del	M977Rfs*15	0.0 ± 0.0	1.6 ± 0.2	T+B-NK+	OS	373 (88%)	0 (0%)	5 d	3 m	Died	no	[9]
		30	Ukraine	25_f	c.2487G>T c.2488A>T	R829S, K830*	29.7 ± 0.8 0.1 ± 0.9	c.2701_2705del	P901*	0.0 ± 0.0	7.4 ± 0.4	T+B-NK+	OS	546 (33%)	33 (2%)	1 m	6 m	Died	no	[9]
		31	Serbia	26_m	c.2486G>T	R829S	29.7 ± 0.8	c.2487A>T	K830*	0.1 ± 0.9	14.9 ± 0.8	T+B-NK+	OS	**	**	1 m	3 m	Alive after HSCT, 17 y.o.	no	[19]
						Severe Combined Immunodeficicency
		32	Poland	27_f	c.256_257del	K86Vfs*33	2.7 ± 0.3	c.256_257del	K86Vfs*33	2.7 ± 0.3	2.7 ± 0.3	T-B-NK+	SCID	119 (20%)	37 (2%)	1 d	1 d	Died after HSCT, 6 m.	no	[11]
		33	Poland	28_m	c.256_257del	K86Vfs*33	2.7 ± 0.3	c.983G>A	C328Y	16.0 ± 2.9	9.3 ± 1.6	T-B-NK+	SCID	238 (24%)	42 (4%)	1 m	5 m	Alive after HSCT, 1 y.o.	no
		34	Russia	29_m	c.256_257del	K86Vfs*33	2.7 ± 0.3	c.1870C>T	R624C	0.1 ± 0.9	1.4 ± 0.6	T-B-NK+	SCID	112 (7%)	0 (0.1%)	2 m	3 m	Alive after HSCT, 1 y.o.	no
		35	Russia	11a_m	c.256_257del	K86Vfs*33	2.7 ± 0.3	c.2164G>A	E722Q	0.0 ± 0.2	1.3 ± 0.2	T-B-NK+	SCID	92 (1.2%)	0 (0%)	1 m	2 m	Died	no
		36	Slovakia	30_m	c.256_257del	K86Vfs*33	2.7 ± 0.3	c.2345 T>A	V782D	0.0 ± 0.0	1.3 ± 0.2	T-B-NK+	SCID	0 (0%)	0 (0.1%)	2 m	6 m	Alive after HSCT, 3 y.o.	no
		37	Poland	31_m	c.256_257del	K86Vfs*33	2.7 ± 0.3	c.2619_2685del	P874Gfs*82	0.0 ± 0.0	1.3 ± 0.2	T-B-NK+	SCID	110 (20.8%)	6 (1.1%)	6 m	7 m	Alive after HSCT, 9 y.o.	no	[10]
		38	Russia	32_f	c.256_257del	K86Vfs*33	2.7 ± 0.3	c.3004C>T	L1002F	12.8 ± 1.1	7.7 ± 0.7	T-B-NK+	SCID	50 (3%)	0 (0.1%)	3 d	5 m	Alive after HSCT, 2 y.o.	no
		39	Poland	21a_f	c.983G>A	C328Y	16.0 ± 2.9	c.2771ins~10 k	c.2771ins~10 kb	0.0 ± 0.0	8.0 ± 1.4	T-B-NK+	SCID	0	0	1 m	1 m	Alive after HSCT, 11 y.o.	no
		40	Poland	21c_m	c.983G>A	C328Y	16.0 ± 2.9	c.2771ins~10 k	c.2771ins~10 kb	0.0 ± 0.0	8.0 ± 1.4	T-B-NK+	SCID	1 (0.4%)	1 (0.4%)	1 m	2 m	Died	no
		41	Russia	33a_f	с.1229G>A	R410Q	0.0 ± 0.0	c.2210G>A	R737H	0.2 ± 0.0	0.1 ± 0.0	T-B-NK-	SCID	1812# (61.2%)	0 (0%)	1m	2 m	Alive after HSCT, 4 y.o.	no
		42	Russia	33b_f	с.1229G>A	R410Q	0.0 ± 0.0	c.2210G>A	R737H	0.2 ± 0.0	0.1 ± 0.0	T-B-NK+	SCID	10	0	1m	4 m	Died	no
		43	Czech Rep	34_f	с.1229G>A	R410Q	0.0 ± 0.0	c.2690G>A	R897Q	3.7 ± 0.2	1.8 ± 0.1	T-B-NK-	SCID	2085# (30%)	56 (0.8%)	2 m	4 m	Alive after HSCT, 9 y.o.	no
		44	Czech Rep	35_m	c.2005G>A	Q669K	0.2 ± 0.1	c.2005G>A	Q669K	0.2 ± 0.1	0.2 ± 0.0	T-B-NK-	SCID	14584# (72%)	17 (0.1%)	7 w	9 w	Alive after HSCT, 5 y.o.	no
				Atypical SCID
		45	Poland	36_m	c.256_257del	K86Vfs*33	2.7 ± 0.3	c.256_257del	K86Vfs*33	2.7 ± 0.3	2.7 ± 0.3	T+B-NK+	atypSCID	1238 (80.4%)	10 (0.7%)	1y 3 m	3y 6m	Died	no
		46	Poland	37_f	c.256_257del	K86Vfs*33	2.7 ± 0.3	c.256_257del	K86Vfs*33	2.7 ± 0.3	2.7 ± 0.3	T+B-NK+	atypSCID	5097 (80.8%)	29 (0.5%)	1 m	5 m	Died	no	[13]
		47	Poland	38_m	c.256_257del	K86Vfs*33	2.7 ± 0.3	c.256_257del	K86Vfs*33	2.7 ± 0.3	2.7 ± 0.3	T-B-NK+	atypSCID	264 (27.2%)	160 (16.5%)	10 m	10 m	Alive after HSCT, 16 y.o.	no	[13]
		48	Poland	39_f	c.256_257del	K86Vfs*33	2.7 ± 0.3	c.256_257del	K86Vfs*33	2.7 ± 0.3	2.7 ± 0.3	T-B-NK+	atypSCID	197 (28%)	88 (12.5%)	3 m	1y 1 m	Alive after HSCT, 11 y.o.	yes	[13]
		49	Poland	40_m	c.256_257del	K86Vfs*33	2.7 ± 0.3	c.256_257del	K86Vfs*33	2.7 ± 0.3	2.7 ± 0.3	T-B-NK+	atypSCID	127 (29%)	86 (19.6%)	10 m	3y 11m	Alive after HSCT, 8 y.o.	no	[13]
		50	Poland	41a_m	c.256_257del	K86Vfs*33	2.7 ± 0.3	c.256_257del	K86Vfs*33	2.7 ± 0.3	2.7 ± 0.3	T+B-NK+	atypSCID	300	400	1y 5m	1y 5m	Alive after HSCT, 15 y.o.	yes	[13]
		51	Poland	41b_m	c.256_257del	K86Vfs*33	2.7 ± 0.3	c.256_257del	K86Vfs*33	2.7 ± 0.3	2.7 ± 0.3	T+B-NK+	atypSCID	500	400	2y 5m	2y 6m	Alive after HSCT, 17 y.o.	yes	[13]
		52	Poland	42_f	c.256_257del	K86Vfs*33	2.7 ± 0.3	c.256_257del	K86Vfs*33	2.7 ± 0.3	2.7 ± 0.3	T-B-NK+	atypSCID	241 (28%)	126 (15%)	1y 5m	1y 7m	Alive, 2 y.o.	no
		53	Poland	43_m	c.256_257del	K86Vfs*33	2.7 ± 0.3	c.256_257del	K86Vfs*33	2.7 ± 0.3	2.7 ± 0.3	T+B-NK+	atypSCID	2292 (32%)	43 (0.6%)	5 m	8 m	Alive after HSCT, 3 y.o.	no
		54	Serbia	44a_m	c.256_257del	K86Vfs*33	2.7 ± 0.3	c.256_257del	K86Vfs*33	2.7 ± 0.3	2.7 ± 0.3	T+B-NK+	atypSCID	820	0	3 m	4 m	Died	yes	[12]
		55	Serbia	44b_f	c.256_257del	K86Vfs*33	2.7 ± 0.3	c.256_257del	K86Vfs*33	2.7 ± 0.3	2.7 ± 0.3	T+B-NK+	atypSCID	428	0	1y 4m	1y 4m	Died	yes	[12]
		56	Serbia	44c_m	c.256_257del	K86Vfs*33	2.7 ± 0.3	c.256_257del	K86Vfs*33	2.7 ± 0.3	2.7 ± 0.3	T+B-NK+	atypSCID	3400	320	3 m	13 m	Died	yes	[12]
		57	Ukraine	45_f	c.256_257del	K86Vfs*33	2.7 ± 0.3	c.256_257del	K86Vfs*33	2.7 ± 0.3	2.7 ± 0.3	T+B(low)NK+	atypSCID	3068 (92.4%)	166 (5%)	9 m	1y 10m	Alive after HSCT, 6 y.o.	no	[9]
		58	Slovenia	46_m	c.256_257del	K86Vfs*33	2.7 ± 0.3	c.937T>C	C313R	2.1 ± 0.5	2.4 ± 0.4	T+B+NK+	atypSCID	3348 (54%)	806 (13%)	12 m	3 y	Died	no	[20]
		59	Ukraine	47_f	c.256_257del	K86Vfs*33	2.7 ± 0.3	c.1331C>T	A444V	1.4 ± 0.2	2.1 ± 0.2	T-B-NK+	atypSCID	47 (26%)	0 (0%)	1 y	1y 9m	Alive after HSCT, 5 y.o.	no	[9]
		60	Poland	48_f	c.256_257del	K86Vfs*33	2.7 ± 0.3	c.1331C>T	A444V	1.4 ± 0.2	2.1 ± 0.2	T+B-NK+	atypSCID	64 (36.8%)	0 (0.2%)	2 y	4y 7 m	Died	no	[19]
		61	Belarus	49_m	c.322C>A	R108*	1.8 ± 0.3	c.1211G>A	R404Q	1.2 ± 0.1	1.5 ± 0.2	T-B-NK+	atypSCID	19 (13.3%)	34 (23.5%)	11 m	1y 2m	Died after HSCT, 2 y.	no	[9]
		62	Russia	50_f	c.424C>T	R142*	9.0 ± 4.0	c.1430C>G	T477S	87.6± 1.3	48.3 ± 2.6	T+B(low)NK+	atypSCID	1020 (64%)	240 (15%)	6 m	2y 5m	Died after HSCT, 3 y.	no
		63	Russia	51_f	c.2522G>A	R841Q	0.0 ± 0.0	c.2867T>C	I956T	3.5 ± 0.2	1.7 ± 0.1	T-B+NK+	atypSCID	99	414	5 m	1y 7m	Died	no
				CID
		64	Belarus	52_m	c.256_257del	K86Vfs*33	2.7 ± 0.3	c.1331C>T	A444V	1.4 ± 0.2	2.1 ± 0.2	T+B-NK+	CID	620 (72%)	7 (2.1%)	3 y	14 y	Died, 16 y.o.	no	[21]
		65	Russia	53_f	c.256_257del	K86Vfs*33	2.7 ± 0.3	c.1677G>C	R559S	1.0 ± 0.4	1.8 ± 0.3	T+B-NK+	CID	420 (62%)	0 (0%)	6.5 m	9 m	Died after HSCT, 3 y.	no	[13]
		66	Bulgaria	54_f	c.1331C>T	A444V	1.4 ± 0.2	c.1331C>T	A444V	1.4 ± 0.2	1.4 ± 0.2	T+B-NK+	CID	697 (38%)	20 (1.1%)	1 d	1y 4m	Alive, 5 y.o.	no	[18]
		67	Czech Rep	55_f	c.1835A>G	H612R	99.5 ± 1.2	c.1835A>G	H612R	99.5 ± 1.2	99.5 ± 1.2	T-B-NK+	CID	292 (80%)	18 (5%)	3 y	24 y	Alive, 25 y.o.	no
			Yu Nee Lee et al.			J Allergy Clin Immunol 2014;133:1099-108.
			"A systematic analysis of recombination activity and genotype-phenotype correlation in human recombination-activating gene 1 deficiency"
			All new mutations were marked yellow and were studied in Laboratory of Clinical Immunology and Microbiology, Division of Intramural Research, National Institute of Allergy and Infectious Diseases, National Institutes of Health, Bethesda, Maryland, USA.
			# - T cells were maternal origin and/or without proliferation
			**- Mean value and range in [14]
